# Supplementary material for: Effect of 8-hydroxyquinoline and derivatives on human neuroblastoma SH-SY5Y cells under high glucose
Source: PubMed Central journal article supplement (PMC5012261; doi:10.7717/peerj.2389), 2016-08-31

**Fig.1 B**

| Cell viability<br>(% of control) | 8-Hydroxyquinoline ( $\mu\text{M}$ ) – treated for 24 hr |                  |                  |
|----------------------------------|----------------------------------------------------------|------------------|------------------|
|                                  | 0                                                        | 1                | 10               |
| n1                               | 100                                                      | 86.181           | 63.178           |
| n2                               | 100                                                      | 116.604          | 74.519           |
| n3                               | 100                                                      | 79.111           | 63.128           |
| n4                               | 100                                                      | 92.181           | 73.850           |
| mean $\pm$ S.E.M                 | 100                                                      | 93.52 $\pm$ 8.15 | 68.67 $\pm$ 3.19 |
| <i>P</i> value                   |                                                          | ns               | < 0.01           |

| Cell viability<br>(% of control) | Clioquinol ( $\mu\text{M}$ ) – treated for 24 hr |                   |                    |
|----------------------------------|--------------------------------------------------|-------------------|--------------------|
|                                  | 0                                                | 1                 | 10                 |
| n1                               | 100                                              | 114.385           | 103.271            |
| n2                               | 100                                              | 93.719            | 128.591            |
| n3                               | 100                                              | 100.153           | 74.166             |
| n4                               | 100                                              | 95.062            | 94.893             |
| mean $\pm$ S.E.M                 | 100                                              | 100.83 $\pm$ 4.73 | 100.23 $\pm$ 11.26 |
| <i>P</i> value                   |                                                  | ns                | ns                 |

| Cell viability<br>(% of control) | Nitroxoline ( $\mu\text{M}$ ) – treated for 24 hr |                  |                  |
|----------------------------------|---------------------------------------------------|------------------|------------------|
|                                  | 0                                                 | 1                | 10               |
| n1                               | 100                                               | 73.368           | 41.216           |
| n2                               | 100                                               | 99.712           | 44.217           |
| n3                               | 100                                               | 80.606           | 36.681           |
| n4                               | 100                                               | 92.088           | 34.568           |
| mean $\pm$ S.E.M                 | 100                                               | 86.44 $\pm$ 5.87 | 39.17 $\pm$ 2.18 |
| <i>P</i> value                   |                                                   | ns               | < 0.001          |

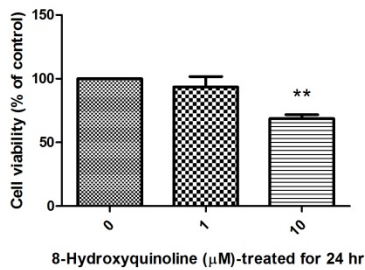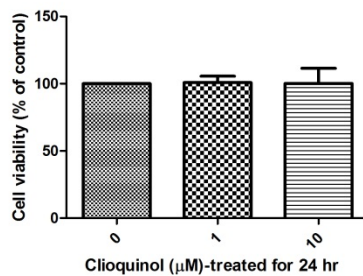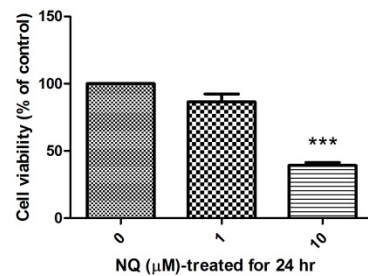

Supplement: peerj-04-2389-s001.pdf [file peerj-04-2389-s001.pdf]
