# Supplementary material for: Effect of 8-hydroxyquinoline and derivatives on human neuroblastoma SH-SY5Y cells under high glucose
Source: PubMed Central journal article supplement (PMC5012261; doi:10.7717/peerj.2389), 2016-08-31

**Fig.4 B**

|                                    | Calpain / $\beta$ -actin (% of control) |                   |                                                 |                              |
|------------------------------------|-----------------------------------------|-------------------|-------------------------------------------------|------------------------------|
|                                    | Control                                 | 120 mM D-Glucose  | 1 $\mu$ M 8-Hydroxyquinoline + 120 mM D-Glucose | 1 $\mu$ M 8-Hydroxyquinoline |
| <b>n1</b>                          | 100                                     | 140.877           | 115.283                                         | 108.643                      |
| <b>n2</b>                          | 100                                     | 122.965           | 99.251                                          | 96.181                       |
| <b>n3</b>                          | 100                                     | 135.733           | 114.919                                         | 109.797                      |
| <b>mean <math>\pm</math> S.E.M</b> | 100                                     | 133.19 $\pm$ 5.32 | 109.82 $\pm$ 5.28                               | 104.87 $\pm$ 4.359           |
| <b>P value</b>                     |                                         | < 0.01            | < 0.05                                          |                              |

**Fig.4 C.**

|                                    | Calpastatin / $\beta$ -actin (% of control) |                   |                                                 |                              |
|------------------------------------|---------------------------------------------|-------------------|-------------------------------------------------|------------------------------|
|                                    | Control                                     | 120 mM D-Glucose  | 1 $\mu$ M 8-Hydroxyquinoline + 120 mM D-Glucose | 1 $\mu$ M 8-Hydroxyquinoline |
| <b>n1</b>                          | 100                                         | 87.956            | 85.845                                          | 81.265                       |
| <b>n2</b>                          | 100                                         | 86.069            | 84.578                                          | 88.129                       |
| <b>n3</b>                          | 100                                         | 75.076            | 99.970                                          | 99.542                       |
| <b>mean <math>\pm</math> S.E.M</b> | 100                                         | 83.034 $\pm$ 4.02 | 90.131 $\pm$ 4.93                               | 89.645 $\pm$ 5.33            |
| <b>P value</b>                     |                                             | < 0.05            | ns                                              |                              |

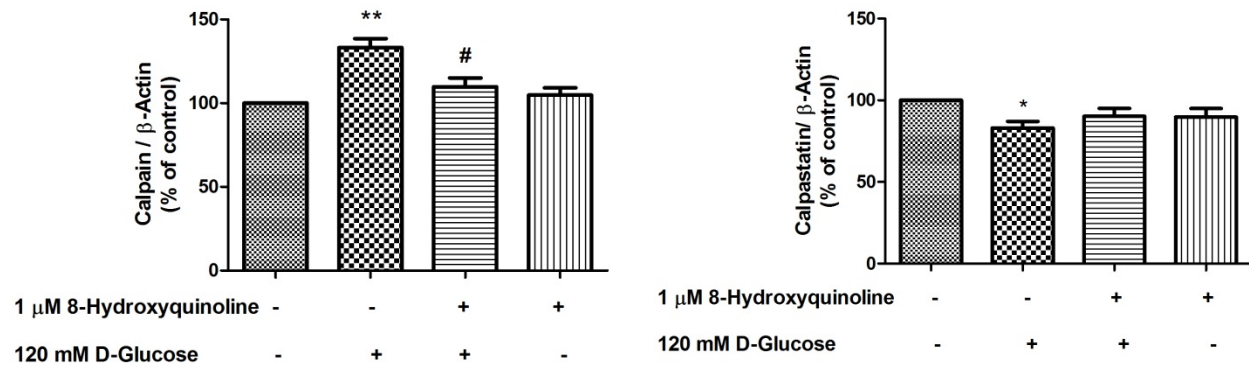

Supplement: peerj-04-2389-s007.pdf [file peerj-04-2389-s007.pdf]
