# Supplementary material for: Effect of 8-hydroxyquinoline and derivatives on human neuroblastoma SH-SY5Y cells under high glucose
Source: PubMed Central journal article supplement (PMC5012261; doi:10.7717/peerj.2389), 2016-08-31

**Fig.4 D**

|                                    | Calpain / $\beta$ -actin (% of control) |                   |                                         |                      |
|------------------------------------|-----------------------------------------|-------------------|-----------------------------------------|----------------------|
|                                    | Control                                 | 120 mM D-Glucose  | 1 $\mu$ M Clioquinol + 120 mM D-Glucose | 1 $\mu$ M Clioquinol |
| <b>n1</b>                          | 100                                     | 140.877           | 104.889                                 | 113.665              |
| <b>n2</b>                          | 100                                     | 122.965           | 96.344                                  | 102.793              |
| <b>n3</b>                          | 100                                     | 135.733           | 113.498                                 | 108.935              |
| <b>mean <math>\pm</math> S.E.M</b> | 100                                     | 133.19 $\pm$ 5.32 | 104.910 $\pm$ 4.95                      | 108.464 $\pm$ 3.15   |
| <b>P value</b>                     |                                         | < 0.01            | < 0.01                                  | ns                   |

**Fig.4 E**

|                                    | Calpastatin / $\beta$ -actin (% of control) |                   |                                         |                      |
|------------------------------------|---------------------------------------------|-------------------|-----------------------------------------|----------------------|
|                                    | Control                                     | 120 mM D-Glucose  | 1 $\mu$ M Clioquinol + 120 mM D-Glucose | 1 $\mu$ M Clioquinol |
| <b>n1</b>                          | 100                                         | 87.956            | 92.247                                  | 95.645               |
| <b>n2</b>                          | 100                                         | 86.069            | 93.039                                  | 98.096               |
| <b>n3</b>                          | 100                                         | 75.076            | 81.032                                  | 98.837               |
| <b>mean <math>\pm</math> S.E.M</b> | 100                                         | 83.034 $\pm$ 4.02 | 88.773 $\pm$ 3.88                       | 97.526 $\pm$ 0.96    |
| <b>P value</b>                     |                                             | < 0.05            | ns                                      | ns                   |

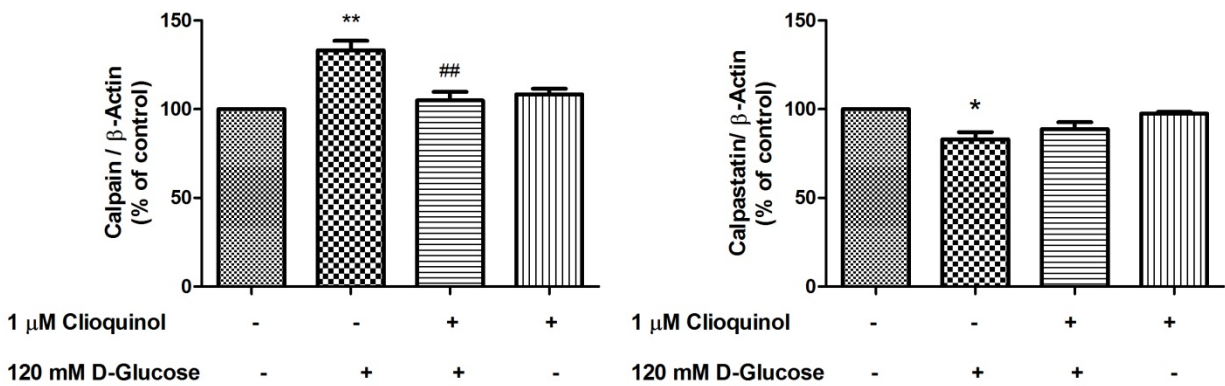

Supplement: peerj-04-2389-s008.pdf [file peerj-04-2389-s008.pdf]
