# Supplementary material for: Effect of 8-hydroxyquinoline and derivatives on human neuroblastoma SH-SY5Y cells under high glucose
Source: PubMed Central journal article supplement (PMC5012261; doi:10.7717/peerj.2389), 2016-08-31

**Fig.4 F**

|                                    | Calpain / $\beta$ -actin (% of control) |                   |                                          |                       |
|------------------------------------|-----------------------------------------|-------------------|------------------------------------------|-----------------------|
|                                    | Control                                 | 120 mM D-Glucose  | 1 $\mu$ M Nitroxoline + 120 mM D-Glucose | 1 $\mu$ M Nitroxoline |
| <b>n1</b>                          | 100                                     | 140.877           | 106.273                                  | 109.495               |
| <b>n2</b>                          | 100                                     | 122.965           | 102.575                                  | 98.339                |
| <b>n3</b>                          | 100                                     | 135.733           | 107.552                                  | 109.959               |
| <b>mean <math>\pm</math> S.E.M</b> | 100                                     | 133.19 $\pm$ 5.32 | 105.47 $\pm$ 1.49                        | 105.93 $\pm$ 3.80     |
| <b>P value</b>                     |                                         | < 0.001           | < 0.01                                   | ns                    |

**Fig.4 G.**

|                                    | Calpastatin / $\beta$ -actin (% of control) |                   |                                          |                       |
|------------------------------------|---------------------------------------------|-------------------|------------------------------------------|-----------------------|
|                                    | Control                                     | 120 mM D-Glucose  | 1 $\mu$ M Nitroxoline + 120 mM D-Glucose | 1 $\mu$ M Nitroxoline |
| <b>n1</b>                          | 100                                         | 87.956            | 92.201                                   | 87.113                |
| <b>n2</b>                          | 100                                         | 86.069            | 88.606                                   | 96.521                |
| <b>n3</b>                          | 100                                         | 75.076            | 88.017                                   | 99.345                |
| <b>mean <math>\pm</math> S.E.M</b> | 100                                         | 83.034 $\pm$ 4.02 | 89.61 $\pm$ 1.31                         | 94.33 $\pm$ 3.70      |
| <b>P value</b>                     |                                             | < 0.05            | ns                                       | ns                    |

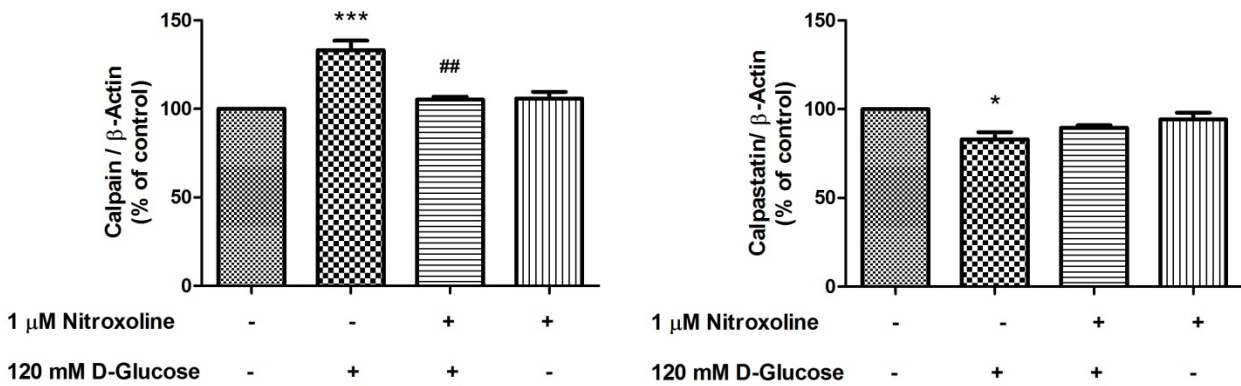

Supplement: peerj-04-2389-s009.pdf [file peerj-04-2389-s009.pdf]
