# Supplementary material for: Effect of 8-hydroxyquinoline and derivatives on human neuroblastoma SH-SY5Y cells under high glucose
Source: PubMed Central journal article supplement (PMC5012261; doi:10.7717/peerj.2389), 2016-08-31

Fig.2 A

| % cell viability | D-Glucose (mM), treated for 2 hr |                  |                  |                  |
|------------------|----------------------------------|------------------|------------------|------------------|
|                  | 5.5                              | 30               | 60               | 120              |
| n1               | 100                              | 96.730           | 93.138           | 86.737           |
| n2               | 100                              | 96.644           | 91.017           | 87.392           |
| n3               | 100                              | 96.961           | 91.503           | 78.431           |
| n4               | 100                              | 95.204           | 89.586           | 77.798           |
| mean $\pm$ S.E.M | 100                              | 96.38 $\pm$ 0.39 | 91.31 $\pm$ 0.73 | 82.59 $\pm$ 2.59 |
| <i>P</i> value   |                                  | ns               | < 0.01           | < 0.001          |

| % cell viability | D-Mannitol (mM), treated for 2 hr |                  |                  |                  |
|------------------|-----------------------------------|------------------|------------------|------------------|
|                  | 5.5                               | 30               | 60               | 120              |
| n1               | 100                               | 101.607          | 97.444           | 94.290           |
| n2               | 100                               | 105.999          | 99.187           | 96.934           |
| n3               | 100                               | 87.610           | 101.328          | 101.327          |
| mean $\pm$ S.E.M | 100                               | 98.41 $\pm$ 5.55 | 99.32 $\pm$ 1.12 | 97.52 $\pm$ 2.05 |
| <i>P</i> value   |                                   | ns               | ns               | ns               |

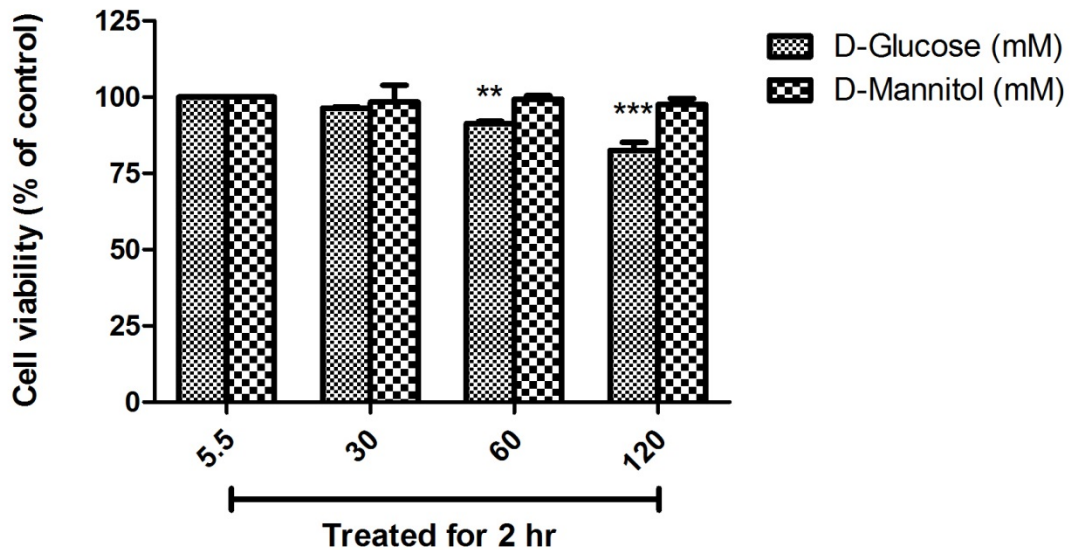

Supplement: peerj-04-2389-s002.pdf [file peerj-04-2389-s002.pdf]
