# Supplementary material for: Effect of 8-hydroxyquinoline and derivatives on human neuroblastoma SH-SY5Y cells under high glucose
Source: PubMed Central journal article supplement (PMC5012261; doi:10.7717/peerj.2389), 2016-08-31

**Fig.2 B**

| % cell viability | D-Glucose (mM), treated for 24 hr |              |              |              |
|------------------|-----------------------------------|--------------|--------------|--------------|
|                  | 5.5                               | 30           | 60           | 120          |
| n1               | 100                               | 80.464       | 79.886       | 76.775       |
| n2               | 100                               | 93.309       | 80.626       | 78.790       |
| n3               | 100                               | 94.716       | 77.973       | 71.549       |
| n4               | 100                               | 87.897       | 75.436       | 68.760       |
| mean + S.E.M     | 100                               | 89.10 ± 3.23 | 78.48 ± 1.16 | 73.97 ± 2.31 |
| <i>P value</i>   |                                   | < 0.05       | < 0.001      | < 0.001      |

| % cell viability | D-Mannitol (mM), treated for 24 hr |              |              |              |
|------------------|------------------------------------|--------------|--------------|--------------|
|                  | 5.5                                | 30           | 60           | 120          |
| n1               | 100                                | 106.995      | 85.464       | 75.922       |
| n2               | 100                                | 98.479       | 77.328       | 73.115       |
| n3               | 100                                | 97.113       | 86.469       | 73.390       |
| n4               | 100                                | 87.697       | 86.616       | 79.310       |
| mean + S.E.M     | 100                                | 97.57 ± 3.95 | 83.97 ± 2.23 | 75.43 ± 1.44 |
| <i>P value</i>   |                                    | ns           | < 0.01       | < 0.001      |

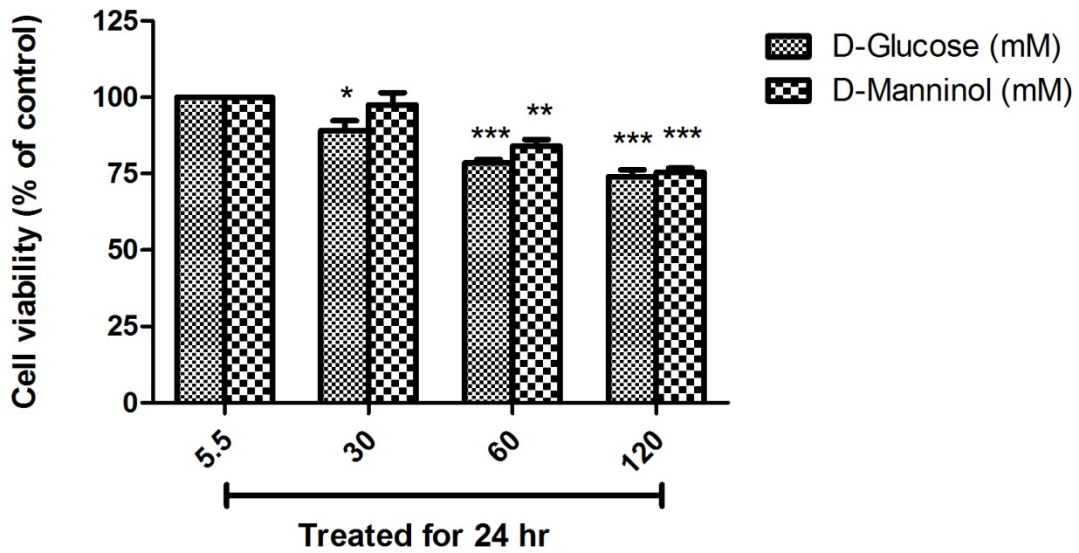

Supplement: peerj-04-2389-s003.pdf [file peerj-04-2389-s003.pdf]
