# Supplementary material for: Effect of 8-hydroxyquinoline and derivatives on human neuroblastoma SH-SY5Y cells under high glucose
Source: PubMed Central journal article supplement (PMC5012261; doi:10.7717/peerj.2389), 2016-08-31

Fig.2 C

| Calpain expression | D-Glucose (mM), treated for 2 hr |                   |                   |                   |
|--------------------|----------------------------------|-------------------|-------------------|-------------------|
|                    | 5.5                              | 30                | 60                | 120               |
| n1                 | 100                              | 92.985            | 115.593           | 139.111           |
| n2                 | 100                              | 97.085            | 105.694           | 119.156           |
| n3                 | 100                              | 111.922           | 122.141           | 147.935           |
| n4                 | 100                              | 106.833           | 105.543           | 112.565           |
| mean $\pm$ S.E.M   | 100                              | 102.21 $\pm$ 4.35 | 112.24 $\pm$ 4.05 | 129.69 $\pm$ 8.30 |
| <i>P</i> value     |                                  | ns                | ns                | < 0.01            |

| Calpain expression | D-Glucose (mM), treated for 24 hr |                   |                   |                   |
|--------------------|-----------------------------------|-------------------|-------------------|-------------------|
|                    | 5.5                               | 30                | 60                | 120               |
| n1                 | 100                               | 98.722            | 106.388           | 140.877           |
| n2                 | 100                               | 101.234           | 104.627           | 122.965           |
| n3                 | 100                               | 108.888           | 118.575           | 135.733           |
| n4                 | 100                               | 104.005           | 111.863           | 138.195           |
| mean $\pm$ S.E.M   | 100                               | 103.21 $\pm$ 2.18 | 110.36 $\pm$ 3.14 | 134.44 $\pm$ 3.97 |
| <i>P</i> value     |                                   | ns                | ns                | < 0.001           |

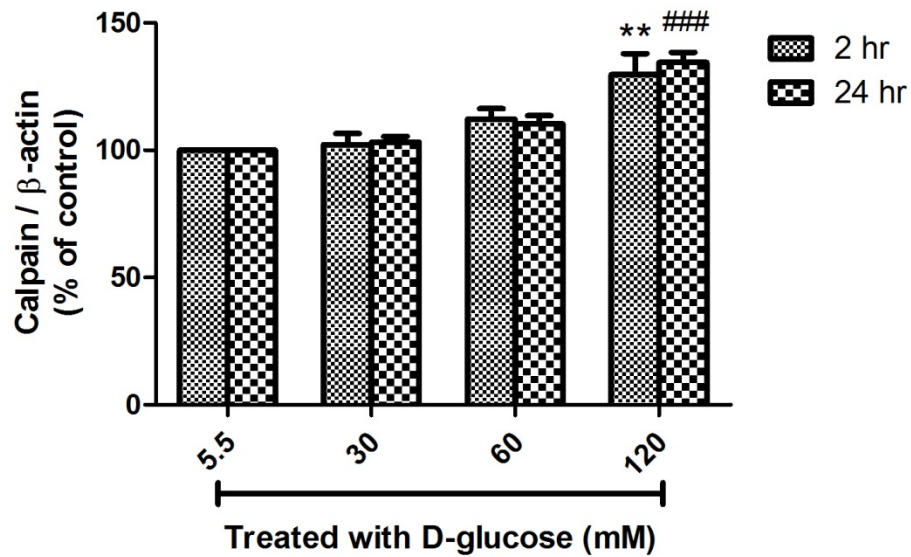

Supplement: peerj-04-2389-s004.pdf [file peerj-04-2389-s004.pdf]
