# Supplementary material for: Effect of 8-hydroxyquinoline and derivatives on human neuroblastoma SH-SY5Y cells under high glucose
Source: PubMed Central journal article supplement (PMC5012261; doi:10.7717/peerj.2389), 2016-08-31

Fig.2 D

| Calpastatin expression | D-Glucose (mM), treated for 2 hr |                   |                   |                   |
|------------------------|----------------------------------|-------------------|-------------------|-------------------|
|                        | 5.5                              | 30                | 60                | 120               |
| n1                     | 100                              | 103.875           | 119.323           | 114.443           |
| n2                     | 100                              | 117.165           | 130.266           | 116.572           |
| n3                     | 100                              | 97.265            | 129.268           | 104.628           |
| n4                     | 100                              | 90.535            | 120.343           | 126.357           |
| mean $\pm$ S.E.M       | 100                              | 102.21 $\pm$ 5.68 | 124.80 $\pm$ 2.88 | 115.50 $\pm$ 4.46 |
| <i>P</i> value         |                                  | ns                | < 0.01            | ns                |

| Calpastatin expression | D-Glucose (mM), treated for 24 hr |                  |                  |                  |
|------------------------|-----------------------------------|------------------|------------------|------------------|
|                        | 5.5                               | 30               | 60               | 120              |
| n1                     | 100                               | 93.33            | 85.257           | 73.252           |
| n2                     | 100                               | 99.187           | 92.834           | 86.069           |
| n3                     | 100                               | 99.716           | 89.654           | 76.005           |
| n4                     | 100                               | 90.081           | 94.446           | 87.956           |
| mean $\pm$ S.E.M       | 100                               | 95.58 $\pm$ 2.34 | 90.55 $\pm$ 2.03 | 75.07 $\pm$ 4.35 |
| <i>P</i> value         |                                   | ns               | ns               | < 0.001          |

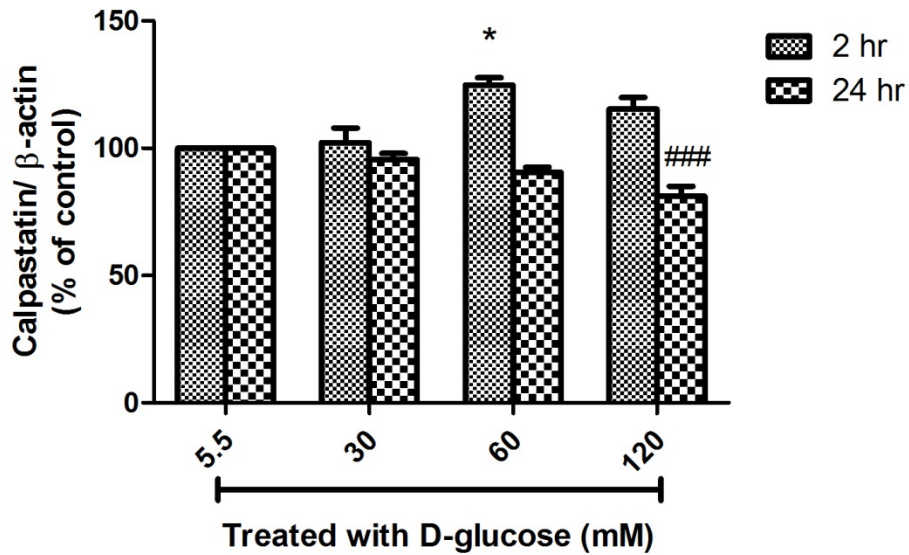

Supplement: peerj-04-2389-s005.pdf [file peerj-04-2389-s005.pdf]
