# Supplementary material for: Effect of 8-hydroxyquinoline and derivatives on human neuroblastoma SH-SY5Y cells under high glucose
Source: PubMed Central journal article supplement (PMC5012261; doi:10.7717/peerj.2389), 2016-08-31

Fig.4 A

| % cell viability                   | Control        |                  | 8-Hydroxyquinoline |                  | Clioquinol       |                  | Nitroxoline      |                  |
|------------------------------------|----------------|------------------|--------------------|------------------|------------------|------------------|------------------|------------------|
|                                    | 5.5 mM Glucose | 120 mM Glucose   | 5.5 mM Glucose     | 120 mM Glucose   | 5.5 mM Glucose   | 120 mM Glucose   | 5.5 mM Glucose   | 120 mM Glucose   |
| <b>n1</b>                          | 100            | 76.775           | 91.181             | 78.912           | 106.261          | 95.226           | 94.851           | 93.739           |
| <b>n2</b>                          | 100            | 78.790           | 100.951            | 93.723           | 103.843          | 92.314           | 106.08           | 95.001           |
| <b>n3</b>                          | 100            | 71.550           | 93.679             | 88.205           | 107.519          | 91.428           | 104.739          | 98.075           |
| <b>n4</b>                          | 100            | 68.760           | 91.349             | 86.726           | 99.374           | 94.438           | 102.218          | 96.079           |
| <b>mean <math>\pm</math> S.E.M</b> | 100            | 73.97 $\pm$ 2.31 | 94.29 $\pm$ 2.29   | 86.89 $\pm$ 3.06 | 104.2 $\pm$ 1.80 | 93.35 $\pm$ 0.89 | 102.0 $\pm$ 2.51 | 95.72 $\pm$ 0.92 |
| <b>P value</b>                     |                | < 0.01           |                    | < 0.01           |                  | < 0.001          |                  | < 0.001          |

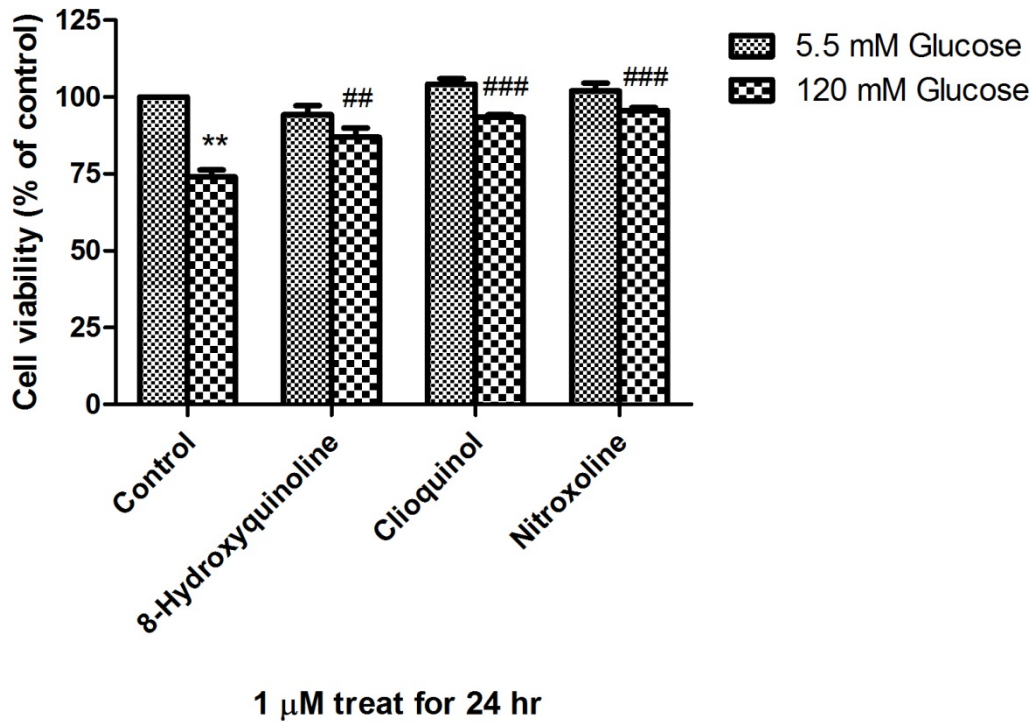

Supplement: peerj-04-2389-s006.pdf [file peerj-04-2389-s006.pdf]
